# Supplementary material for: Academic, clinical and personal experiences of undergraduate healthcare students during the COVID-19 pandemic: A prospective cohort study
Source: PLOS journal article supplement (doi:10.1371/journal.pone.0271873), 2022-07-27
Supplement: S2 (10.1371/journal.pone.0271873.s002) [file journal.pone.0271873.s002]

# Time point 2: An investigation of the long-term impact of the COVID-19 pandemic on the education and

---

Start of Block: Default Question Block

Q1 This is the same survey you answered at the start of semester but as we are learning to live with COVID-19 we would like to assess if your opinions have changed over time or remain the same. Timepoint 2: An investigation of the long-term impact of the COVID-19 pandemic on the education and clinical development

☐ click to consent and continue with survey (1)

---

Q2 Have you completed the first version of his survey at the start of semester ?

☐ Yes (1)

☐ No (2)

---

Q3 What course are you registered on?

- ☐ Diagnostic Radiography and Imaging (2)
  - ☐ Healthcare Science/Health Physiology (6)
  - ☐ Occupational Therapy (5)
  - ☐ Physiotherapy (4)
  - ☐ Podiatry (1)
  - ☐ Radiotherapy and Oncology (3)
  - ☐ Speech and Language Therapy (7)
- 

Q4 In which year of study are you currently enrolled?

- ☐ 1st year (1)
  - ☐ 2nd year (2)
  - ☐ 3rd year (3)
- 

Q5 How would you describe your gender?

- ☐ Female (including transgender women) (1)
  - ☐ Male (including transgender men) (2)
  - ☐ Gender-fluid (4)
  - ☐ Agender (5)
  - ☐ Prefer not to say (6)
  - ☐ Other (7) \_\_\_\_\_
-

Q6 What age are you?

- ☐ less than 20 years old (1)
  - ☐ 20-23 years old (2)
  - ☐ 24 – 30 years old (3)
  - ☐ over 30 years old (4)
- 

Q7 Click all that apply to you

- ☐ I have caring responsibilities (1)
  - ☐ I have a part-time job (2)
  - ☐ I have access and personal use of a car (3)
  - ☐ I have a term time address that is different to my home address (4)
  - ☐ I have access to reliable fast broadband (5)
  - ☐ I have access to a laptop suitable for academic work (6)
  - ☐ I have access to a desk suitable for academic work (7)
  - ☐ I have access to a quiet/adequately sized working space (8)
-

Q8 Have you tested positive for COVID-19?

☐ Yes (3)

☐ No (4)

☐ If you were not tested but had symptoms please give further details if applicable. If you were tested and diagnosed positive, what was this experience like? (5)

---

-----

Q9 Have you had to self-isolate because of close contact ?

☐ Yes at the start of the pandemic (1)

☐ Yes since the start of semester 1 (4)

☐ No I have not had to self-isolate (6)

*Skip To: Q13 If Have you had to self-isolate because of close contact ? = No I have not had to self-isolate*

-----

Q10 If you had to self-isolate, how did you know ?

☐ I had symptoms (1)

☐ I had symptoms and a positive test for COVID-19 (2)

☐ I was notified through a friend/family/work colleague/flat mate (3)

☐ Notified through phone app (4)

-----

Q11 Has this impacted on your learning and teaching ?

- ☐ Yes I missed practicals/classes in university (1)
- ☐ Yes I missed clinical placement (2)
- ☐ I fell behind with my study (4)
- ☐ No it did not impact on me (5)

---

Q12 Were you allowed the opportunity to catch up on what you missed ( if anything)...please give details

---

Q13 What are your thoughts and feelings about COVID-19?

☐ Thinking about the coronavirus (COVID-19) makes me feel threatened and vulnerable. (1)

☐ I am afraid of the coronavirus. (2)

☐ I am not worried about the coronavirus (3)

☐ I am worried that I or people I love or care about will get sick from the coronavirus (4)

☐ I am stressed when I am around other people because I worry I'll catch the coronavirus (5)

☐ I have tried hard to avoid contact with other people as I don't want to become ill. (6)

☐ I am not remotely concerned and happy to get on with things (7)

☐ I find it easy to go out as long as I adhere to with social distancing. (8)

☐ I feel it is all blown out of proportion and COVID-19 is just like any other flu/virus (9)

---

Q14 How would you rate the overall quality of the following platforms for teaching and learning?

|                                  | N/A. Have not used (1) | Excellent (2)         | Average (3)           | Poor (5)              |
|----------------------------------|------------------------|-----------------------|-----------------------|-----------------------|
| Blackboard (1)                   | <input type="radio"/>  | <input type="radio"/> | <input type="radio"/> | <input type="radio"/> |
| Blackboard Collaborate Ultra (2) | <input type="radio"/>  | <input type="radio"/> | <input type="radio"/> | <input type="radio"/> |
| Panopto (3)                      | <input type="radio"/>  | <input type="radio"/> | <input type="radio"/> | <input type="radio"/> |
| Recorded Lectures (4)            | <input type="radio"/>  | <input type="radio"/> | <input type="radio"/> | <input type="radio"/> |
| Blackboard Chatrooms (5)         | <input type="radio"/>  | <input type="radio"/> | <input type="radio"/> | <input type="radio"/> |
| Skype (6)                        | <input type="radio"/>  | <input type="radio"/> | <input type="radio"/> | <input type="radio"/> |
| Zoom (7)                         | <input type="radio"/>  | <input type="radio"/> | <input type="radio"/> | <input type="radio"/> |
| Nearpod (8)                      | <input type="radio"/>  | <input type="radio"/> | <input type="radio"/> | <input type="radio"/> |
| Microsoft Teams (9)              | <input type="radio"/>  | <input type="radio"/> | <input type="radio"/> | <input type="radio"/> |
| Turning Point (10)               | <input type="radio"/>  | <input type="radio"/> | <input type="radio"/> | <input type="radio"/> |

Q15 What is your preferred mechanism for remote teaching and learning and why? (consider the following :recorded lectures, live lectures, chat function, voice interaction, quizzes, worksheets, viewed videos, uploaded videos of self completing a task, discussion groups etc) .

---

Q16 What is your preferred mode for delivery of remote teaching and education?

- ☐ Synchronous - students and lecturers join sessions simultaneously at prearranged times. Lectures are delivered in real-time, Q&A is possible and student-lecturer and/or student-student peer interactions are possible. (1)
- ☐ Asynchronous - students access resources and listen to prerecorded lectures at a time of the student's choosing. Resources remain accessible 24/7, no lecturer is present, no live Q&A is available, students are signposted to learning resources. (2)
- 

Q17 I prefer teaching that is...

- ☐ Consistently delivered in the University (1)
- ☐ Consistently delivered remotely (2)
- ☐ Allows some mixture of the two (3)
- 

Q18 Have you been on campus for lectures since semester 1 started?

- ☐ yes practicals (1)
- ☐ yes seminars/teaching (2)
- ☐ Yes other (3)
- ☐ No I have worked remotely (4)
- 

Q19 Were you happy to come onsite or have you any comments you would like to make?

---



Q20 Have your opinions of COVID-19 changed since the start of this semester?

- ☐ I feel more stressed about the pandemic now that I am back at university (1)
  - ☐ I feel more stressed about the pandemic because I am on clinical placement (2)
  - ☐ My feelings haven't changed (3)
  - ☐ I feel less stressed about the pandemic (4)
  - ☐ I am coping better and learning to live with the pandemic (5)
- 

Q21 I am currently

- ☐ On placement (1)
- ☐ In university (2)
- ☐ Other (3)

*Skip To: Q22 If I am currently = On placement*

*Skip To: Q25 If I am currently = In university*

*Skip To: Q25 If I am currently = Other*

---

*Display This Question:*

*If I am currently = On placement*

*Carry Forward Selected Choices from "I am currently "*

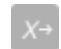

Q22 What trust area are you working in on clinical placement?

- ☐ Belfast Health and Social Care Trust (1)
  - ☐ Southern Health and Social Care Trust (2)
  - ☐ Northern Health and Social Care Trust (3)
  - ☐ Western Health and Social Care Trust (4)
  - ☐ South Eastern Health and Social Care Trust (5)
  - ☐ On placement (6)
  - ☐ In university (7)
  - ☐ Other (8)
-

Q23

How is COVID-19 impacting on your placement right now with respect to:

|                                                                                                     | Negatively<br>(1)     | No<br>Impact<br>(2)   | Not<br>applicable<br>(3) | Positively<br>(4)     | Mixed<br>(5)          |
|-----------------------------------------------------------------------------------------------------|-----------------------|-----------------------|--------------------------|-----------------------|-----------------------|
| Integration into the unit/department (1)                                                            | <input type="radio"/> | <input type="radio"/> | <input type="radio"/>    | <input type="radio"/> | <input type="radio"/> |
| Development of professional skill (2)                                                               | <input type="radio"/> | <input type="radio"/> | <input type="radio"/>    | <input type="radio"/> | <input type="radio"/> |
| Development of practical skills (4)                                                                 | <input type="radio"/> | <input type="radio"/> | <input type="radio"/>    | <input type="radio"/> | <input type="radio"/> |
| Development of interpersonal skills (6)                                                             | <input type="radio"/> | <input type="radio"/> | <input type="radio"/>    | <input type="radio"/> | <input type="radio"/> |
| Accessibility of technology to engage with online university learning/interactions/supervision? (8) | <input type="radio"/> | <input type="radio"/> | <input type="radio"/>    | <input type="radio"/> | <input type="radio"/> |
| Level of clinical supervision and feedback (5)                                                      | <input type="radio"/> | <input type="radio"/> | <input type="radio"/>    | <input type="radio"/> | <input type="radio"/> |
| Opportunity to engage face to face with patients (7)                                                | <input type="radio"/> | <input type="radio"/> | <input type="radio"/>    | <input type="radio"/> | <input type="radio"/> |
| Assessment of your skills and knowledge (9)                                                         | <input type="radio"/> | <input type="radio"/> | <input type="radio"/>    | <input type="radio"/> | <input type="radio"/> |
| Making and maintaining friendships (12)                                                             | <input type="radio"/> | <input type="radio"/> | <input type="radio"/>    | <input type="radio"/> | <input type="radio"/> |
| Mental Wellbeing (14)                                                                               | <input type="radio"/> | <input type="radio"/> | <input type="radio"/>    | <input type="radio"/> | <input type="radio"/> |
| Ability to seek academic support (13)                                                               | <input type="radio"/> | <input type="radio"/> | <input type="radio"/>    | <input type="radio"/> | <input type="radio"/> |
| Personal circumstances (10)                                                                         | <input type="radio"/> | <input type="radio"/> | <input type="radio"/>    | <input type="radio"/> | <input type="radio"/> |
| Financial circumstances (11)                                                                        | <input type="radio"/> | <input type="radio"/> | <input type="radio"/>    | <input type="radio"/> | <input type="radio"/> |

Q24 Have you any additional comments on how COVID-19 is impacting on your placement right now?

---

Q25 How is COVID-19 impacting on the following right now move each item into the category you feel is most appropriate

| Negatively                                      | No Impact                                       | Positively                                      | Mixed                                           |
|-------------------------------------------------|-------------------------------------------------|-------------------------------------------------|-------------------------------------------------|
| _____ Learning environment (1)                  | _____ Learning environment (1)                  | _____ Learning environment (1)                  | _____ Learning environment (1)                  |
| _____ Accessibility to suitable technology (2)  | _____ Accessibility to suitable technology (2)  | _____ Accessibility to suitable technology (2)  | _____ Accessibility to suitable technology (2)  |
| _____ Development of practical skills (3)       | _____ Development of practical skills (3)       | _____ Development of practical skills (3)       | _____ Development of practical skills (3)       |
| _____ Your assessments (4)                      | _____ Your assessments (4)                      | _____ Your assessments (4)                      | _____ Your assessments (4)                      |
| _____ Personal circumstances (5)                | _____ Personal circumstances (5)                | _____ Personal circumstances (5)                | _____ Personal circumstances (5)                |
| _____ Financial circumstances (6)               | _____ Financial circumstances (6)               | _____ Financial circumstances (6)               | _____ Financial circumstances (6)               |
| _____ Making and maintaining friendships (7)    | _____ Making and maintaining friendships (7)    | _____ Making and maintaining friendships (7)    | _____ Making and maintaining friendships (7)    |
| _____ Ability to get academic support (8)       | _____ Ability to get academic support (8)       | _____ Ability to get academic support (8)       | _____ Ability to get academic support (8)       |
| _____ Mental Wellbeing (9)                      | _____ Mental Wellbeing (9)                      | _____ Mental Wellbeing (9)                      | _____ Mental Wellbeing (9)                      |
| _____ Development of your overall learning (10) | _____ Development of your overall learning (10) | _____ Development of your overall learning (10) | _____ Development of your overall learning (10) |

Q26 How comfortable/confident do you feel with face to face interactions with patients during the COVID pandemic?

0 = not confident      10 = confident

0   1   2   3   4   5   6   7   8   9   10

|       |                                                                                    |
|-------|------------------------------------------------------------------------------------|
| 1 ( ) |  |
|-------|------------------------------------------------------------------------------------|

Q27 Have you used remote consultations with patients previously (telephone reviews/ video consultations etc. on previous placements, as part of your training)?

☐ Yes (1)

☐ No (2)

☐ Not applicable (4)

*Skip To: Q31 If Have you used remote consultations with patients previously (telephone reviews/ video consultations etc. on previous placements, as part of your training)? = Not applicable*

*Skip To: Q31 If Have you used remote consultations with patients previously (telephone reviews/ video consultations etc. on previous placements, as part of your training)? = No*

Q28 Have you had much training/experience using remote consultations with patients?

0 = No training      10 = A lot of training

0   1   2   3   4   5   6   7   8   9   10

|                             |                                                                                      |
|-----------------------------|--------------------------------------------------------------------------------------|
| Click to write Choice 1 ( ) |  |
|-----------------------------|--------------------------------------------------------------------------------------|

Q29

How confident do you feel using remote consultations with patients during the COVID pandemic? 0 = Not confident      10 = Confident

0   1   2   3   4   5   6   7   8   9   10

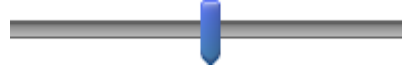

Q30 Can you identify any concerns you have using remote consultations with patients and how these can be addressed?

---

Q31 Regarding PPE do you feel you have:

|                                                                            | Yes (1)               | No (2)                | Unsure (3)            |
|----------------------------------------------------------------------------|-----------------------|-----------------------|-----------------------|
| Adequate access to appropriate PPE (1)                                     | <input type="radio"/> | <input type="radio"/> | <input type="radio"/> |
| Sufficient knowledge about appropriate PPE for your caseload (2)           | <input type="radio"/> | <input type="radio"/> | <input type="radio"/> |
| Sufficient training, support, advice on use and donning/doffing of PPE (3) | <input type="radio"/> | <input type="radio"/> | <input type="radio"/> |
| Problems with wearing PPE for example allergies/irritation (4)             | <input type="radio"/> | <input type="radio"/> | <input type="radio"/> |
| Problems with FIT testing of masks (11)                                    | <input type="radio"/> | <input type="radio"/> | <input type="radio"/> |

Q32 Any additional comments on PPE?

---

Q33

Has coverage of COVID-19 (news and/or social media) affected the following:

|                                                               | Not at all (1)        | Yes – in a positive way (2) | Yes – in a negative way (3) |
|---------------------------------------------------------------|-----------------------|-----------------------------|-----------------------------|
| Your thoughts about a career as a healthcare professional (1) | <input type="radio"/> | <input type="radio"/>       | <input type="radio"/>       |
| Decisions/thoughts about your clinical placements? (2)        | <input type="radio"/> | <input type="radio"/>       | <input type="radio"/>       |

Q34 Can you give further details on how COVID-19 has influenced your thoughts on placement and/or your choice of profession ?

---

Q35 Are you using any strategies to help keep yourself physically and mentally well at the moment?

☐ Yes (1)

☐ No (2)

*Skip To: Q37 If Are you using any strategies to help keep yourself physically and mentally well at the moment? = No*

Q36 Can you give more details on any coping strategies you are using to keep physically and mentally fit?

---

Q37 Where did you live during semester 1?

- ☐ term time address (1)
- ☐ at hospital accommodation (2)
- ☐ university halls of residence (3)
- ☐ at home (4)
- ☐ started in one of the first 3 but moved home as semester progressed (5)

*Skip To: Q40 If Where did you live during semester 1? = at home*

---

Q38 If you moved home were you able to terminate your contract on your term time address ?

- ☐ Yes (1)
  - ☐ No (2)
  - ☐ Negotiating it at present (3)
  - ☐ Not applicable (4)
- 

Q39 If you didn't move home, why did you stay in your term time address if lectures were online?

---



Q40 Regarding shielding self or relatives

|                                                                       | Yes (1)               | No (2)                |
|-----------------------------------------------------------------------|-----------------------|-----------------------|
| Do you live with someone who is shielding or at high risk? (1)        | <input type="radio"/> | <input type="radio"/> |
| Have you altered where you would normally live to protect others? (2) | <input type="radio"/> | <input type="radio"/> |

Q41

If you answered yes to shielding how did this impact on you? Financially, socially, psychologically?

---

Q42

How concerned are you about possibly transmitting/spreading COVID to a member of your household? 0 = Not concerned 10 = Very concerned

0 1 2 3 4 5 6 7 8 9 10

|       |                                                                                      |
|-------|--------------------------------------------------------------------------------------|
| 1 ( ) |  |
|-------|--------------------------------------------------------------------------------------|

Q43 Have you any additional comments to add regarding the impact of the COVID-19 pandemic on your learning and teaching?

---

Q44 We would really like to explore the results of this survey further. If you would like to participate in a focus group in semester two please insert your email address in the box below.

---

Q45 If you would like to participate in a focus group in semester two please tick which date suits.

- ☐ Focus group 1- 26th of January 19:00 (Tues) (1)
- ☐ Focus group 2- 15th of February 19:00 (Mon) (4)
- ☐ Focus group 3 - 9th of March 19:00 (Tues) (5)

Q46 Thank you for taking the time to complete this survey. It is very much appreciated.

End of Block: Default Question Block

---
